# Supplementary material
Source: publisher figshare collection journal article supplement (https://karger.figshare.com/ndownloader/files/27338381)
Supplement: Supplementary file 1 [file 27338381]

**Online Supplementary Material**

**
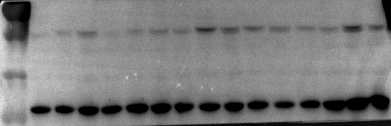
**

Fig. S1. The original image of Ac-tubulin in placenta-derived MSCs from different donors by immuno-blotting. The molecular weight of GAPDH is 37 kd. The molecular weight of Ac-tubulin is 50kd.
